# Supplementary material for: 3D variability analysis reveals a hidden conformational change controlling ammonia transport in human asparagine synthetase
Source: Springer Nature journal article supplement (doi:10.1038/s41467-024-54912-9), 2024-12-03
Supplement: MOESM3 [file 41467_2024_54912_MOESM3_ESM.pdf]

=====  
 ATOMTYPES and PARAMETERS for molecule:  
 Structure4  
 =====

Total charge of the system = -1.0000  
 Formal charge of the system = -1.0000

Charges

| atom | formal | fractional | formal |
|------|--------|------------|--------|
| 1    | 0      | 0.000      |        |
| 2    | -1     | -0.500     |        |
| 3    | 0      | 0.000      |        |
| 4    | 0      | -0.500     |        |
| 5    | 0      | 0.000      |        |
| 6    | 0      | 0.000      |        |
| 7    | 0      | 0.000      |        |
| 8    | 0      | 0.000      |        |
| 9    | 0      | 0.000      |        |
| 10   | 0      | 0.000      |        |
| 11   | 0      | 0.000      |        |
| 12   | 0      | 0.000      |        |
| 13   | 0      | 0.000      |        |
| 14   | 0      | 0.000      |        |
| 15   | 0      | 0.000      |        |
| 16   | 0      | 0.000      |        |
| 17   | 0      | 0.000      |        |
| 18   | 0      | 0.000      |        |
| 19   | 0      | 0.000      |        |
| 20   | 0      | 0.000      |        |
| 21   | 0      | 0.000      |        |
| 22   | 0      | 0.000      |        |
| 23   | 0      | 0.000      |        |
| 24   | 0      | 0.000      |        |
| 25   | 0      | 0.000      |        |
| 26   | 0      | 0.000      |        |
| 27   | 0      | 0.000      |        |
| 28   | 0      | 0.000      |        |
| 29   | 1      | 1.000      |        |
| 30   | 0      | -0.500     |        |
| 31   | -1     | -0.500     |        |
| 32   | 0      | 0.000      |        |
| 33   | 0      | 0.000      |        |
| 34   | 0      | 0.000      |        |
| 35   | 0      | 0.000      |        |
| 36   | 0      | 0.000      |        |
| 37   | 0      | 0.000      |        |
| 38   | 0      | 0.000      |        |
| 39   | 0      | 0.000      |        |
| 40   | 0      | 0.000      |        |
| 41   | 0      | 0.000      |        |
| 42   | 0      | 0.000      |        |
| 43   | 0      | 0.000      |        |
| 44   | 0      | 0.000      |        |
| 45   | 0      | 0.000      |        |
| 46   | 0      | 0.000      |        |
| 47   | 0      | 0.000      |        |
| 48   | 0      | 0.000      |        |
| 49   | 0      | 0.000      |        |

| BCI's |     | index | type | type | bci     | assignment | info   |          |
|-------|-----|-------|------|------|---------|------------|--------|----------|
| P1    | O2  | 0     | 450  | 441  | -0.4700 | exact type | P2-O2Z |          |
| P1    | O3  | 0     | 450  | 452  | -0.4100 | exact type | P2-OS  |          |
| P1    | O4  | 0     | 450  | 441  | -0.4700 | exact type | P2-O2Z |          |
| P1    | O5  | 0     | 450  | 452  | -0.4100 | exact type | P2-OS  |          |
| O3    | C24 | 0     | 452  | 465  | 0.0800  | score 180  | OS-CO4 | ==> OS-C |
| O5    | C6  | 0     | 452  | 135  | 0.2000  | exact type | OS-CT  |          |
| C6    | C7  | 0     | 135  | 181  | 0.0000  | exact type | CT-CT  |          |
| C6    | H32 | 0     | 135  | 140  | 0.0600  | exact type | CT-HC  |          |
| C6    | H33 | 0     | 135  | 140  | 0.0600  | exact type | CT-HC  |          |

|     |     |   |     |     |         |                |           |
|-----|-----|---|-----|-----|---------|----------------|-----------|
| C7  | O8  | 0 | 181 | 180 | -0.2000 | exact type     | CT-OS     |
| C7  | C9  | 0 | 181 | 135 | -0.0000 | exact type     | CT-CT     |
| C7  | H34 | 0 | 181 | 140 | 0.0300  | exact type     | CT-HC     |
| O8  | C13 | 0 | 180 | 931 | 0.2000  | exact type     | OS-CO     |
| C9  | O10 | 0 | 135 | 154 | -0.2650 | exact type     | CT-OH     |
| C9  | C11 | 0 | 135 | 135 | 0.0000  | exact type     | CT-CT     |
| C9  | H35 | 0 | 135 | 140 | 0.0600  | exact type     | CT-HC     |
| O10 | H36 | 0 | 154 | 240 | 0.4180  | exact type     | OH-HO     |
| C11 | O12 | 0 | 135 | 154 | -0.2650 | exact type     | CT-OH     |
| C11 | C13 | 0 | 135 | 931 | 0.0000  | empirical rule | CT-CO     |
| C11 | H37 | 0 | 135 | 140 | 0.0600  | exact type     | CT-HC     |
| O12 | H38 | 0 | 154 | 240 | 0.4180  | exact type     | OH-HO     |
| C13 | N14 | 0 | 931 | 354 | -0.3500 | exact type     | CO-N*     |
| C13 | H39 | 0 | 931 | 140 | 0.1000  | exact type     | CO-HC     |
| N14 | C15 | 0 | 354 | 353 | 0.0796  | exact type     | N*-CRAB   |
| N14 | C23 | 0 | 354 | 349 | 0.0704  | exact type     | N*-C56A   |
| C15 | N16 | 0 | 353 | 352 | -0.3204 | exact type     | CRAB-NNA  |
| C15 | H40 | 0 | 353 | 146 | 0.2000  | exact type     | CRAB-HA   |
| N16 | C17 | 0 | 352 | 350 | 0.1696  | exact type     | NNA-C56B  |
| C17 | C18 | 0 | 350 | 351 | 0.0333  | exact type     | C56B-CA   |
| C17 | C23 | 0 | 350 | 349 | -0.0137 | exact type     | C56B-C56A |
| C18 | N19 | 0 | 351 | 356 | -0.0700 | exact type     | CA-NND    |
| C18 | N20 | 0 | 351 | 346 | -0.3367 | exact type     | CA-NB     |
| N19 | H41 | 0 | 356 | 240 | 0.3700  | exact type     | NND-H     |
| N19 | H42 | 0 | 356 | 240 | 0.3700  | exact type     | NND-H     |
| N20 | C21 | 0 | 346 | 347 | 0.1933  | exact type     | NB-CQ     |
| C21 | N22 | 0 | 347 | 348 | -0.2267 | exact type     | CQ-NB     |
| C21 | H43 | 0 | 347 | 146 | 0.2000  | exact type     | CQ-HA     |
| N22 | C23 | 0 | 348 | 349 | 0.3233  | exact type     | NB-C56A   |
| C24 | O25 | 0 | 465 | 281 | -0.4300 | exact type     | CO4-O     |
| C24 | C26 | 0 | 465 | 135 | -0.0000 | exact type     | CO4-CT    |
| C26 | C27 | 0 | 135 | 951 | 0.0000  | empirical rule | CT-CT     |
| C26 | H44 | 0 | 135 | 140 | 0.0600  | exact type     | CT-HC     |
| C26 | H45 | 0 | 135 | 140 | 0.0600  | exact type     | CT-HC     |
| C27 | C28 | 0 | 951 | 952 | 0.0000  | empirical rule | CT-CO3    |
| C27 | N29 | 0 | 951 | 286 | -0.1225 | empirical rule | CT-NP     |
| C27 | H46 | 0 | 951 | 140 | 0.0600  | exact symbol   | CT-HC     |
| C28 | O30 | 0 | 952 | 954 | -0.2225 | empirical rule | CO3-O2Z   |
| C28 | O31 | 0 | 952 | 954 | -0.2225 | empirical rule | CO3-O2Z   |
| N29 | H47 | 0 | 286 | 240 | 0.2100  | empirical rule | NP-H      |
| N29 | H48 | 0 | 286 | 240 | 0.2100  | empirical rule | NP-H      |
| N29 | H49 | 0 | 286 | 240 | 0.2100  | empirical rule | NP-H      |

OPLSAA FORCE FIELD TYPE ASSIGNED

| atom | type | vdw | symbol | charge  | sigma  | epsilon | quality | comment                     |
|------|------|-----|--------|---------|--------|---------|---------|-----------------------------|
| P1   | 450  | P1  | P2     | 1.7600  | 3.7400 | 0.2000  | high    | P in PO2-                   |
| O2   | 441  | O8  | O2Z    | -0.9700 | 2.9800 | 0.2000  | high    | O- in OP                    |
| O3   | 452  | O16 | OS     | -0.4900 | 2.8500 | 0.1400  | high    | OR in PO3R-                 |
| O4   | 441  | O8  | O2Z    | -0.9700 | 2.9800 | 0.2000  | high    | O= in OP                    |
| O5   | 452  | O16 | OS     | -0.6100 | 2.8500 | 0.1400  | high    | OR in PO3R-                 |
| C6   | 135  | C1  | CT     | 0.0800  | 3.5000 | 0.0660  | high    | C: alkanes                  |
| C7   | 181  | C1  | CT     | 0.1700  | 3.5000 | 0.0660  | high    | C: ether                    |
| O8   | 180  | O1  | OS     | -0.4000 | 2.9000 | 0.1400  | high    | O: ether                    |
| C9   | 135  | C1  | CT     | 0.2050  | 3.5000 | 0.0660  | high    | C: alkanes                  |
| O10  | 154  | O3  | OH     | -0.6830 | 3.1200 | 0.1700  | high    | O: mono alcohols            |
| C11  | 135  | C1  | CT     | 0.2050  | 3.5000 | 0.0660  | high    | C: alkanes                  |
| O12  | 154  | O3  | OH     | -0.6830 | 3.1200 | 0.1700  | high    | O: mono alcohols            |
| C13  | 931  | C1  | CO     | 0.4500  | 3.5000 | 0.0660  | high    | nucleosides                 |
| N14  | 354  | N1  | N*     | -0.5000 | 3.2500 | 0.1700  | high    | Adenine N9                  |
| C15  | 353  | C5  | CRAB   | 0.2000  | 3.5000 | 0.0800  | high    | Adenine C8                  |
| N16  | 352  | N1  | NNA    | -0.4900 | 3.2500 | 0.1700  | high    | Adenine N7                  |
| C17  | 350  | C5  | C56B   | 0.1500  | 3.5000 | 0.0800  | high    | Adenine C5                  |
| C18  | 351  | C5  | CA     | 0.4400  | 3.5000 | 0.0800  | high    | Adenine C6                  |
| N19  | 356  | N1  | NND    | -0.8100 | 3.2500 | 0.1700  | high    | Adenine N-C6                |
| N20  | 346  | N1  | NB     | -0.5300 | 3.2500 | 0.1700  | high    | Adenine N1                  |
| C21  | 347  | C5  | CQ     | 0.2200  | 3.5000 | 0.0800  | high    | Adenine C2                  |
| N22  | 348  | N1  | NB     | -0.5500 | 3.2500 | 0.1700  | high    | Adenine N3                  |
| C23  | 349  | C5  | C56A   | 0.3800  | 3.5000 | 0.0800  | high    | Adenine C4                  |
| C24  | 465  | C2  | CO4    | 0.5100  | 3.7500 | 0.1050  | high    | AA C: esters and thioesters |

|     |     |    |     |         |        |        |      |                                     |
|-----|-----|----|-----|---------|--------|--------|------|-------------------------------------|
| O25 | 281 | O2 | O   | -0.4300 | 2.9600 | 0.2100 | high | O: ketone, aldehyde, ester, acid    |
| C26 | 135 | C1 | CT  | -0.1200 | 3.5000 | 0.0660 | high | C: alkanes                          |
| C27 | 951 | C1 | CT  | 0.0625  | 3.5000 | 0.0660 | high | glycine zwit. 6-31G* CHELPG charges |
| C28 | 952 | C2 | CO3 | 0.4450  | 3.7500 | 0.1050 | high | glycine zwit. 6-31G* CHELPG charges |
| N29 | 286 | N7 | NP  | 0.2475  | 3.2500 | 0.1700 | high | glycine zwit. 6-31G* CHELPG charges |
| O30 | 954 | O9 | O2Z | -0.7225 | 3.1500 | 0.2500 | high | glycine zwit. 6-31G* CHELPG charges |
| O31 | 954 | O9 | O2Z | -0.7225 | 3.1500 | 0.2500 | high | glycine zwit. 6-31G* CHELPG charges |
| H32 | 140 | H1 | HC  | 0.0600  | 2.5000 | 0.0300 | high | H: alkanes                          |
| H33 | 140 | H1 | HC  | 0.0600  | 2.5000 | 0.0300 | high | H: alkanes                          |
| H34 | 140 | H1 | HC  | 0.0300  | 2.5000 | 0.0300 | high | H: alkanes                          |
| H35 | 140 | H1 | HC  | 0.0600  | 2.5000 | 0.0300 | high | H: alkanes                          |
| H36 | 240 | H8 | HO  | 0.4180  | 0.5000 | 0.0300 | high | H(O): alcohols                      |
| H37 | 140 | H1 | HC  | 0.0600  | 2.5000 | 0.0300 | high | H: alkanes                          |
| H38 | 240 | H8 | HO  | 0.4180  | 0.5000 | 0.0300 | high | H(O): alcohols                      |
| H39 | 140 | H4 | HC  | 0.1000  | 2.5000 | 0.0500 | high | Me A H-CN9                          |
| H40 | 146 | H4 | HA  | 0.2000  | 2.5000 | 0.0500 | high | Adenine H-C8                        |
| H41 | 240 | H8 | H   | 0.3700  | 0.5000 | 0.0300 | high | H on neutral N                      |
| H42 | 240 | H8 | H   | 0.3700  | 0.5000 | 0.0300 | high | H on neutral N                      |
| H43 | 146 | H4 | HA  | 0.2000  | 2.5000 | 0.0500 | high | Adenine H-C2                        |
| H44 | 140 | H7 | HC  | 0.0600  | 2.4200 | 0.0150 | high | H on C-alpha in ether               |
| H45 | 140 | H7 | HC  | 0.0600  | 2.4200 | 0.0150 | high | H on C-alpha in ether               |
| H46 | 140 | H1 | HC  | 0.0600  | 2.5000 | 0.0300 | high | H: alkanes                          |
| H47 | 240 | H8 | H   | 0.2100  | 0.5000 | 0.0300 | high | H attached to N+                    |
| H48 | 240 | H8 | H   | 0.2100  | 0.5000 | 0.0300 | high | H attached to N+                    |
| H49 | 240 | H8 | H   | 0.2100  | 0.5000 | 0.0300 | high | H attached to N+                    |

| Stretch |     | k         | r0      | quality | bt     | comment   |               |
|---------|-----|-----------|---------|---------|--------|-----------|---------------|
| P1      | O2  | 525.00000 | 1.48000 | high    | 0 => 0 | P2-O2Z    | ==> P2-O2Z    |
| P1      | O3  | 230.00000 | 1.69700 | high    | 0 => 0 | P2-OS     | ==> P2-OS     |
| P1      | O4  | 525.00000 | 1.48000 | high    | 0 => 0 | P2-O2Z    | ==> P2-O2Z    |
| P1      | O5  | 230.00000 | 1.69700 | high    | 0 => 0 | P2-OS     | ==> P2-OS     |
| O3      | C24 | 214.00000 | 1.32700 | high    | 0 => 0 | OS-CO4    | ==> OS-CO4    |
| O5      | C6  | 320.00000 | 1.41000 | high    | 0 => 0 | OS-CT     | ==> OS-CT     |
| C6      | C7  | 268.00000 | 1.52900 | high    | 0 => 0 | CT-CT     | ==> CT-CT     |
| C6      | H32 | 340.00000 | 1.09000 | high    | 0 => 0 | CT-HC     | ==> HC-CT     |
| C6      | H33 | 340.00000 | 1.09000 | high    | 0 => 0 | CT-HC     | ==> HC-CT     |
| C7      | O8  | 320.00000 | 1.41000 | high    | 0 => 0 | CT-OS     | ==> OS-CT     |
| C7      | C9  | 268.00000 | 1.52900 | high    | 0 => 0 | CT-CT     | ==> CT-CT     |
| C7      | H34 | 340.00000 | 1.09000 | high    | 0 => 0 | CT-HC     | ==> HC-CT     |
| O8      | C13 | 320.00000 | 1.38000 | high    | 0 => 0 | OS-CO     | ==> OS-CO     |
| C9      | O10 | 320.00000 | 1.41000 | high    | 0 => 0 | CT-OH     | ==> OH-CT     |
| C9      | C11 | 268.00000 | 1.52900 | high    | 0 => 0 | CT-CT     | ==> CT-CT     |
| C9      | H35 | 340.00000 | 1.09000 | high    | 0 => 0 | CT-HC     | ==> HC-CT     |
| O10     | H36 | 553.00000 | 0.94500 | high    | 0 => 0 | OH-HO     | ==> OH-HO     |
| C11     | O12 | 320.00000 | 1.41000 | high    | 0 => 0 | CT-OH     | ==> OH-CT     |
| C11     | C13 | 250.00000 | 1.52700 | high    | 0 => 0 | CT-CO     | ==> CT-CO     |
| C11     | H37 | 340.00000 | 1.09000 | high    | 0 => 0 | CT-HC     | ==> HC-CT     |
| O12     | H38 | 553.00000 | 0.94500 | high    | 0 => 0 | OH-HO     | ==> OH-HO     |
| C13     | N14 | 275.00000 | 1.47900 | high    | 0 => 0 | CO-N*     | ==> N*-CO     |
| C13     | H39 | 340.00000 | 1.09000 | high    | 0 => 0 | CO-HC     | ==> HC-CO     |
| N14     | C15 | 440.00000 | 1.37100 | high    | 0 => 0 | N*-CRAB   | ==> N*-CRAB   |
| N14     | C23 | 436.00000 | 1.37400 | high    | 0 => 0 | N*-C56A   | ==> N*-C56A   |
| C15     | N16 | 529.00000 | 1.30400 | high    | 0 => 0 | CRAB-NNA  | ==> NNA-CRAB  |
| C15     | H40 | 367.00000 | 1.08000 | high    | 0 => 0 | CRAB-HA   | ==> HA-CRAB   |
| N16     | C17 | 414.00000 | 1.39100 | high    | 0 => 0 | NNA-C56B  | ==> NNA-C56B  |
| C17     | C18 | 469.00000 | 1.40400 | high    | 0 => 0 | C56B-CA   | ==> CA-C56B   |
| C17     | C23 | 447.00000 | 1.41900 | high    | 0 => 0 | C56B-C56A | ==> C56B-C56A |
| C18     | N19 | 481.00000 | 1.34000 | high    | 0 => 0 | CA-NND    | ==> NND-CA    |
| C18     | N20 | 483.00000 | 1.33900 | high    | 0 => 0 | CA-NB     | ==> NB-CA     |
| N19     | H41 | 434.00000 | 1.01000 | high    | 0 => 0 | NND-H     | ==> NND-H     |
| N19     | H42 | 434.00000 | 1.01000 | high    | 0 => 0 | NND-H     | ==> NND-H     |
| N20     | C21 | 502.00000 | 1.32400 | high    | 0 => 0 | NB-CQ     | ==> NB-CQ     |
| C21     | N22 | 502.00000 | 1.32400 | high    | 0 => 0 | CQ-NB     | ==> NB-CQ     |
| C21     | H43 | 367.00000 | 1.08000 | high    | 0 => 0 | CQ-HA     | ==> HA-CQ     |
| N22     | C23 | 461.00000 | 1.35400 | high    | 0 => 0 | NB-C56A   | ==> NB-C56A   |
| C24     | O25 | 570.00000 | 1.22900 | high    | 0 => 0 | CO4-O     | ==> O-CO4     |
| C24     | C26 | 317.00000 | 1.52200 | high    | 0 => 0 | CO4-CT    | ==> CT-CO4    |
| C26     | C27 | 268.00000 | 1.52900 | high    | 0 => 0 | CT-CT     | ==> CT-CT     |
| C26     | H44 | 340.00000 | 1.09000 | high    | 0 => 0 | CT-HC     | ==> HC-CT     |

|     |     |           |         |      |   |      |         |             |
|-----|-----|-----------|---------|------|---|------|---------|-------------|
| C26 | H45 | 340.00000 | 1.09000 | high | 0 | => 0 | CT-HC   | ==> HC-CT   |
| C27 | C28 | 317.00000 | 1.52200 | high | 0 | => 0 | CT-CO3  | ==> CT-CO3  |
| C27 | N29 | 367.00000 | 1.47100 | high | 0 | => 0 | CT-NP   | ==> NP-CT   |
| C27 | H46 | 340.00000 | 1.09000 | high | 0 | => 0 | CT-HC   | ==> HC-CT   |
| C28 | O30 | 656.00000 | 1.25000 | high | 0 | => 0 | CO3-O2Z | ==> O2Z-CO3 |
| C28 | O31 | 656.00000 | 1.25000 | high | 0 | => 0 | CO3-O2Z | ==> O2Z-CO3 |
| N29 | H47 | 434.00000 | 1.01000 | high | 0 | => 0 | NP-H    | ==> NP-H    |
| N29 | H48 | 434.00000 | 1.01000 | high | 0 | => 0 | NP-H    | ==> NP-H    |
| N29 | H49 | 434.00000 | 1.01000 | high | 0 | => 0 | NP-H    | ==> NP-H    |

| Bending |     |     | k         | theta0    | quality | at | comment       |                  |
|---------|-----|-----|-----------|-----------|---------|----|---------------|------------------|
| O2      | P1  | O3  | 100.00000 | 108.23000 | high    | 0  | O2Z-P2-OS     | ==> OS-P2-O2Z    |
| O2      | P1  | O4  | 140.00000 | 119.90000 | high    | 0  | O2Z-P2-O2Z    | ==> O2Z-P2-O2Z   |
| O2      | P1  | O5  | 100.00000 | 108.23000 | high    | 0  | O2Z-P2-OS     | ==> OS-P2-O2Z    |
| O3      | P1  | O4  | 100.00000 | 108.23000 | high    | 0  | OS-P2-O2Z     | ==> OS-P2-O2Z    |
| O3      | P1  | O5  | 45.00000  | 102.60000 | high    | 0  | OS-P2-OS      | ==> OS-P2-OS     |
| O4      | P1  | O5  | 100.00000 | 108.23000 | high    | 0  | O2Z-P2-OS     | ==> OS-P2-O2Z    |
| P1      | O3  | C24 | 80.00000  | 120.00000 | med     | 0  | P2-OS-CO4     | ==> C?-OS-P?     |
| P1      | O5  | C6  | 100.00000 | 120.50000 | high    | 0  | P2-OS-CT      | ==> P2-OS-CT     |
| O5      | C6  | C7  | 50.00000  | 109.50000 | high    | 0  | OS-CT-CT      | ==> OS-CT-CT     |
| O5      | C6  | H32 | 35.00000  | 109.50000 | high    | 0  | OS-CT-HC      | ==> OS-CT-HC     |
| O5      | C6  | H33 | 35.00000  | 109.50000 | high    | 0  | OS-CT-HC      | ==> OS-CT-HC     |
| C7      | C6  | H32 | 37.50000  | 110.70000 | high    | 0  | CT-CT-HC      | ==> HC-CT-CT     |
| C7      | C6  | H33 | 37.50000  | 110.70000 | high    | 0  | CT-CT-HC      | ==> HC-CT-CT     |
| H32     | C6  | H33 | 33.00000  | 107.80000 | high    | 0  | HC-CT-HC      | ==> HC-CT-HC     |
| C6      | C7  | O8  | 50.00000  | 109.50000 | high    | 0  | CT-CT-OS      | ==> OS-CT-CT     |
| C6      | C7  | C9  | 58.35000  | 112.70000 | high    | 0  | CT-CT-CT      | ==> CT-CT-CT     |
| C6      | C7  | H34 | 37.50000  | 110.70000 | high    | 0  | CT-CT-HC      | ==> HC-CT-CT     |
| O8      | C7  | C9  | 50.00000  | 109.50000 | high    | 0  | OS-CT-CT      | ==> OS-CT-CT     |
| O8      | C7  | H34 | 35.00000  | 109.50000 | high    | 0  | OS-CT-HC      | ==> OS-CT-HC     |
| C9      | C7  | H34 | 37.50000  | 110.70000 | high    | 0  | CT-CT-HC      | ==> HC-CT-CT     |
| C7      | O8  | C13 | 60.00000  | 109.50000 | high    | 0  | CT-OS-CO      | ==> CT-OS-CO     |
| C7      | C9  | O10 | 50.00000  | 109.50000 | high    | 0  | CT-CT-OH      | ==> OH-CT-CT     |
| C7      | C9  | C11 | 58.35000  | 112.70000 | high    | 0  | CT-CT-CT      | ==> CT-CT-CT     |
| C7      | C9  | H35 | 37.50000  | 110.70000 | high    | 0  | CT-CT-HC      | ==> HC-CT-CT     |
| O10     | C9  | C11 | 50.00000  | 109.50000 | high    | 0  | OH-CT-CT      | ==> OH-CT-CT     |
| O10     | C9  | H35 | 35.00000  | 109.50000 | high    | 0  | OH-CT-HC      | ==> OH-CT-HC     |
| C11     | C9  | H35 | 37.50000  | 110.70000 | high    | 0  | CT-CT-HC      | ==> HC-CT-CT     |
| C9      | O10 | H36 | 55.00000  | 108.50000 | high    | 0  | CT-OH-HO      | ==> HO-OH-CT     |
| C9      | C11 | O12 | 50.00000  | 109.50000 | high    | 0  | CT-CT-OH      | ==> OH-CT-CT     |
| C9      | C11 | C13 | 75.00000  | 109.43000 | high    | 0  | CT-CT-CO      | ==> CT-CT-CO     |
| C9      | C11 | H37 | 37.50000  | 110.70000 | high    | 0  | CT-CT-HC      | ==> HC-CT-CT     |
| O12     | C11 | C13 | 90.00000  | 111.58700 | high    | 0  | OH-CT-CO      | ==> OH-CT-CO     |
| O12     | C11 | H37 | 35.00000  | 109.50000 | high    | 0  | OH-CT-HC      | ==> OH-CT-HC     |
| C13     | C11 | H37 | 45.00000  | 108.72000 | high    | 0  | CO-CT-HC      | ==> HC-CT-CO     |
| C11     | O12 | H38 | 55.00000  | 108.50000 | high    | 0  | CT-OH-HO      | ==> HO-OH-CT     |
| O8      | C13 | C11 | 90.00000  | 108.56700 | high    | 0  | OS-CO-CT      | ==> OS-CO-CT     |
| O8      | C13 | N14 | 105.00000 | 106.22000 | high    | 0  | OS-CO-N*      | ==> OS-CO-N*     |
| O8      | C13 | H39 | 35.00000  | 109.50000 | high    | 0  | OS-CO-HC      | ==> OS-CO-HC     |
| C11     | C13 | N14 | 75.00000  | 107.44000 | high    | 0  | CT-CO-N*      | ==> N*-CO-CT     |
| C11     | C13 | H39 | 45.00000  | 112.01100 | high    | 0  | CT-CO-HC      | ==> HC-CO-CT     |
| N14     | C13 | H39 | 55.00000  | 103.44000 | high    | 0  | N*-CO-HC      | ==> N*-CO-HC     |
| C13     | N14 | C15 | 70.00000  | 128.80000 | high    | 0  | CO-N*-CRAB    | ==> CRAB-N*-CT   |
| C13     | N14 | C23 | 70.00000  | 125.80000 | high    | 0  | CO-N*-C56A    | ==> C56A-N*-CT   |
| C15     | N14 | C23 | 70.00000  | 105.40000 | high    | 0  | CRAB-N*-C56A  | ==> CRAB-N*-C56A |
| N14     | C15 | N16 | 70.00000  | 113.90000 | high    | 0  | N*-CRAB-NNA   | ==> NNA-CRAB-N*  |
| N14     | C15 | H40 | 35.00000  | 123.05000 | high    | 0  | N*-CRAB-HA    | ==> N*-CRAB-HA   |
| N16     | C15 | H40 | 35.00000  | 123.05000 | high    | 0  | NNA-CRAB-HA   | ==> NNA-CRAB-HA  |
| C15     | N16 | C17 | 70.00000  | 103.80000 | high    | 0  | CRAB-NNA-C56B | ==> CRAB-NNA-    |
| C56B    |     |     |           |           |         |    |               |                  |
| N16     | C17 | C18 | 70.00000  | 132.40000 | high    | 0  | NNA-C56B-CA   | ==> NNA-C56B-CA  |
| N16     | C17 | C23 | 70.00000  | 110.40000 | high    | 0  | NNA-C56B-C56A | ==> NNA-C56B-    |
| C56A    |     |     |           |           |         |    |               |                  |
| C18     | C17 | C23 | 85.00000  | 116.20000 | high    | 0  | CA-C56B-C56A  | ==> CA-C56B-C56A |
| C17     | C18 | N19 | 70.00000  | 123.50000 | high    | 0  | C56B-CA-NND   | ==> NND-CA-C56B  |
| C17     | C18 | N20 | 70.00000  | 117.30000 | high    | 0  | C56B-CA-NB    | ==> NB-CA-C56B   |
| N19     | C18 | N20 | 70.00000  | 119.30000 | high    | 0  | NND-CA-NB     | ==> NND-CA-NB    |
| C18     | N19 | H41 | 35.00000  | 120.00000 | high    | 0  | CA-NND-H      | ==> H-NND-CA     |
| C18     | N19 | H42 | 35.00000  | 120.00000 | high    | 0  | CA-NND-H      | ==> H-NND-CA     |
| H41     | N19 | H42 | 35.00000  | 120.00000 | high    | 0  | H-NND-H       | ==> H-NND-H      |
| C18     | N20 | C21 | 70.00000  | 118.60000 | high    | 0  | CA-NB-CQ      | ==> CQ-NB-CA     |









|                |     |     |     |       |       |       |       |      |   |            |
|----------------|-----|-----|-----|-------|-------|-------|-------|------|---|------------|
| H46            | C27 | N29 | H47 | 0.000 | 0.000 | 0.261 | 0.000 | high | 0 | HC-CT-NP-H |
| ==> H-NP-CT-HC |     |     |     |       |       |       |       |      |   |            |
| H46            | C27 | N29 | H48 | 0.000 | 0.000 | 0.261 | 0.000 | high | 0 | HC-CT-NP-H |
| ==> H-NP-CT-HC |     |     |     |       |       |       |       |      |   |            |
| H46            | C27 | N29 | H49 | 0.000 | 0.000 | 0.261 | 0.000 | high | 0 | HC-CT-NP-H |
| ==> H-NP-CT-HC |     |     |     |       |       |       |       |      |   |            |

| improper Torsion |     |     |     | V2     | quality | comment                          |
|------------------|-----|-----|-----|--------|---------|----------------------------------|
| C15              | C23 | N14 | C13 | 8.000  | high    | aromatic atom                    |
| N16              | H40 | C15 | N14 | 2.200  | high    | aromatic atom                    |
| C18              | C23 | C17 | N16 | 8.000  | high    | aromatic atom                    |
| N19              | N20 | C18 | C17 | 8.000  | high    | aromatic atom                    |
| H42              | C18 | N19 | H41 | 2.000  | high    | amino substituted aromatic rings |
| N22              | H43 | C21 | N20 | 2.200  | high    | aromatic atom                    |
| C17              | N22 | C23 | N14 | 8.000  | high    | aromatic atom                    |
| O3               | C26 | C24 | O25 | 21.000 | high    | carbonyl and analogs             |
| O31              | C27 | C28 | O30 | 21.000 | high    | carboxylate                      |
