# Supplementary material for: 3D variability analysis reveals a hidden conformational change controlling ammonia transport in human asparagine synthetase
Source: Springer Nature journal article supplement (doi:10.1038/s41467-024-54912-9), 2024-12-03
Supplement: MOESM5 [file 41467_2024_54912_MOESM5_ESM.pdf]

| Reliability and reproducibility checklist for molecular dynamics simulations<br>*All boxes must be marked YES by acceptance unless an N/A option is available                                                                                                                                                          |                                                                                              | Yes                                 | N/A                                 | Response<br>(Please state where this information can be found in the text)                                                                                                                 |
|------------------------------------------------------------------------------------------------------------------------------------------------------------------------------------------------------------------------------------------------------------------------------------------------------------------------|----------------------------------------------------------------------------------------------|-------------------------------------|-------------------------------------|--------------------------------------------------------------------------------------------------------------------------------------------------------------------------------------------|
| <b>1. Convergence of simulations and analysis</b>                                                                                                                                                                                                                                                                      |                                                                                              |                                     |                                     |                                                                                                                                                                                            |
| 1a. Is an evaluation presented in the text to show that the property being measured has equilibrated in the simulations (e.g. time-course analysis)?                                                                                                                                                                   |                                                                                              | <input checked="" type="checkbox"/> |                                     | Supplementary Figures                                                                                                                                                                      |
| 1b. Then, is it described in the text how simulations are split into equilibration and production runs and how much data were analyzed from production runs?                                                                                                                                                           |                                                                                              | <input checked="" type="checkbox"/> |                                     | Methods                                                                                                                                                                                    |
| 1c. Are there at least 3 simulations per simulation condition with statistical analysis?                                                                                                                                                                                                                               |                                                                                              | <input checked="" type="checkbox"/> |                                     | Supplementary Figures 18, 24 and 33                                                                                                                                                        |
| 1d. Is evidence provided in the text that the simulation results presented are independent of initial configuration?                                                                                                                                                                                                   |                                                                                              | <input checked="" type="checkbox"/> |                                     | Supplementary Figures 18, 24 and 33                                                                                                                                                        |
| <b>2. Connection to experiments</b>                                                                                                                                                                                                                                                                                    |                                                                                              |                                     |                                     |                                                                                                                                                                                            |
| 2a. Are calculations provided that can connect to experiments (e.g. loss or gain in function from mutagenesis, binding assays, NMR chemical shifts, J-couplings, SAXS curves, interaction distances or FRET distances, structure factors, diffusion coefficients, bulk modulus and other mechanical properties, etc.)? |                                                                                              | <input checked="" type="checkbox"/> |                                     | Results                                                                                                                                                                                    |
| <b>3. Method choice</b>                                                                                                                                                                                                                                                                                                |                                                                                              |                                     |                                     |                                                                                                                                                                                            |
| 3a. Is it described in the text what force field and water model are used and why?                                                                                                                                                                                                                                     |                                                                                              | <input checked="" type="checkbox"/> |                                     | Methods                                                                                                                                                                                    |
| 3b. Do simulations contain membranes, membrane proteins, intrinsically disordered proteins, glycans, nucleic acids, polymers, or cryptic ligand binding?                                                                                                                                                               |                                                                                              | <input type="checkbox"/>            | <input checked="" type="checkbox"/> | Response not needed if N/A                                                                                                                                                                 |
|                                                                                                                                                                                                                                                                                                                        | If 3b is YES, are enhanced sampling methods used?                                            | <input checked="" type="checkbox"/> | <input type="checkbox"/>            | Enhanced sampling is used to obtain potential energy surfaces for the R142 side chain in the presence and absence of the aspartyl-AMP ligand.                                              |
|                                                                                                                                                                                                                                                                                                                        | If enhanced sampling methods are used, are the convergence criteria clearly stated?          | <input checked="" type="checkbox"/> |                                     | Convergence data are shown in Supplementary Figures 35 and 36. A script for analyzing the enhanced sampling data (uploaded into the Zenodo repository) is provided as Supplementary Data 2 |
|                                                                                                                                                                                                                                                                                                                        | If 3b is YES, is it explained in the text why or why not enhanced sampling methods are used? | <input checked="" type="checkbox"/> |                                     | Results and Supplementary Fig. 19                                                                                                                                                          |
| <b>4. Code and reproducibility</b>                                                                                                                                                                                                                                                                                     |                                                                                              |                                     |                                     |                                                                                                                                                                                            |
| 4a. Is a table provided describing the system setup, such as simulation box dimensions, total number of atoms, total number of water molecules, salt concentration, lipid composition (number of molecules and type)?                                                                                                  |                                                                                              | <input checked="" type="checkbox"/> |                                     | Source data                                                                                                                                                                                |
| 4b. Is it described in the text what simulation and analysis software and which versions are used?                                                                                                                                                                                                                     |                                                                                              | <input checked="" type="checkbox"/> |                                     | A list of the software packages used to perform                                                                                                                                            |

|                                                                                                                                                            |                                     |                          |                                                                                                                |
|------------------------------------------------------------------------------------------------------------------------------------------------------------|-------------------------------------|--------------------------|----------------------------------------------------------------------------------------------------------------|
|                                                                                                                                                            |                                     |                          | the MD simulations, and to make Supplementary Movies 11-14, is provided in the Reporting Summary               |
| 4c. Are initial coordinate and simulation input files and a coordinate file of the final output provided as supplementary files or in a public repository? | <input checked="" type="checkbox"/> |                          | All MD coordinate and trajectory files are available the Zenodo repository, as shown in Supplementary Table 8. |
| 4d. Is there custom code or custom force field parameters?                                                                                                 | <input checked="" type="checkbox"/> | <input type="checkbox"/> | Custom parameters were used for the $\beta$ -aspartyl-AMP ligand                                               |
| If <b>YES</b> , are they provided as supplementary profiles or in a public repository?                                                                     | <input checked="" type="checkbox"/> |                          | These custom parameters are provided as Supplementary Data 1                                                   |
